# Supplementary material for: Comparison studies of hybrid lead halide [MPb2X7]2− (M = Cu, Ag; X = Br, I) chains: band structures and visible light driven photocatalytic properties
Source: Royal Society of Chemistry journal article supplement (doi:10.1039/c7dt00820a), 2017-01-01
Supplement: c7dt00820a1.pdf [file c7dt00820a1.pdf]

# Comparison Studies of Hybrid Lead Halide [MPb<sub>2</sub>X<sub>7</sub>]<sup>2-</sup> (M = Cu, Ag; X = Br, I) Chains: Band Structures and Visible Light Driven Photocatalytic Properties

Chengyang Yue,\* Xiao-Wu Lei,\* Xin-Xiu Lu, Yan Li, Jun-Chao Wei, Wei Wang, Yun-Dong Yin, Ning  
Wang

## Supporting Information

**Table S1.** Selected bond lengths (Å) for compound **1**.

|               |           |              |           |
|---------------|-----------|--------------|-----------|
| Pb(1)-I(1)    | 2.9448(6) | Pb(2)-I(2)   | 3.0611(6) |
| Pb(1)-I(4)    | 3.0328(6) | Pb(2)-I(7)   | 3.0973(5) |
| Pb(1)-I(2)    | 3.2633(6) | Pb(2)-I(3)   | 3.1564(5) |
| Pb(1)-I(5)    | 3.4346(5) | Pb(2)-I(5)#1 | 3.2879(5) |
| Pb(1)-I(7)#1  | 3.5068(6) | Pb(2)-I(6)#3 | 3.6123(6) |
| Pb(1)-I(7)    | 3.6036(6) | Pb(2)-I(6)   | 3.6453(6) |
| Ag(1)-I(3)#4  | 2.7366(7) | Ni(1)-N(2)   | 2.091(5)  |
| Ag(1)-I(5)    | 2.7787(7) | Ni(1)-N(5)   | 2.109(5)  |
| Ag(1)-I(6)#1  | 2.9320(9) | Ni(1)-N(1)   | 2.125(5)  |
| Ag(1)-I(6)#4  | 2.9867(9) | Ni(1)-N(4)   | 2.126(5)  |
| Pb(2)-Ag(1)#2 | 3.5250(7) | Ni(1)-N(3)   | 2.128(5)  |
| Pb(2)-Ag(1)#1 | 3.5552(7) | Ni(1)-N(6)   | 2.135(5)  |

Symmetry transformations used to generate equivalent atoms: #1 -x, -y, -z; #2 x, y-1, z; #3 -x, -y-1, -z; #4 x, y+1, z.

**Table S2.** Selected bond lengths (Å) for compound **2**.

|               |           |              |           |
|---------------|-----------|--------------|-----------|
| Pb(1)-I(1)    | 2.9456(7) | Pb(2)-I(2)   | 3.0620(7) |
| Pb(1)-I(4)    | 3.0336(7) | Pb(2)-I(5)   | 3.0994(6) |
| Pb(1)-I(2)    | 3.2653(7) | Pb(2)-I(3)   | 3.1585(6) |
| Pb(1)-I(7)    | 3.4365(6) | Pb(2)-I(7)#1 | 3.2889(6) |
| Pb(1)-I(5)#1  | 3.5084(7) | Pb(2)-I(6)   | 3.6135(6) |
| Pb(1)-I(5)    | 3.6050(7) | Pb(2)-I(6)#3 | 3.6457(7) |
| Ag(1)-I(3)#4  | 2.7393(8) | Co(1)-N(6)   | 2.098(5)  |
| Ag(1)-I(6)#4  | 2.9318(9) | Co(1)-N(3)   | 2.114(5)  |
| Ag(1)-I(6)#1  | 2.9874(9) | Co(1)-N(1)   | 2.122(5)  |
| Ag(1)-I(7)    | 2.7788(8) | Co(1)-N(5)   | 2.131(5)  |
| Pb(2)-Ag(1)#2 | 3.5279(8) | Co(1)-N(2)   | 2.131(5)  |
| Pb(2)-Ag(1)#1 | 3.5554(7) | Co(1)-N(4)   | 2.135(5)  |

Symmetry transformations used to generate equivalent atoms: #1  $-x, -y-1, -z-1$ ; #2  $x, y+1, z$ ; #3  $-x, -y, -z-1$ ; #4  $x, y-1, z$ .

**Table S3.** Selected bond lengths (Å) for compound **3**.

|               |            |              |           |
|---------------|------------|--------------|-----------|
| Pb(1)-I(1)    | 2.9461(7)  | Pb(2)-I(2)   | 3.0601(7) |
| Pb(1)-I(4)    | 3.0337(6)  | Pb(2)-I(5)   | 3.1031(6) |
| Pb(1)-I(2)    | 3.2635(7)  | Pb(2)-I(3)   | 3.1659(6) |
| Pb(1)-I(6)    | 3.4327(6)  | Pb(2)-I(6)#1 | 3.2876(6) |
| Pb(1)-I(5)#1  | 3.5072(7)  | Pb(2)-I(7)#3 | 3.6175(7) |
| Pb(1)-I(5)    | 3.5973(7)  | Pb(2)-I(7)   | 3.6519(7) |
| Ag(1)-I(3)#4  | 2.7367(9)  | Zn(1)-N(2)   | 2.125(6)  |
| Ag(1)-I(7)#1  | 2.9347(10) | Zn(1)-N(5)   | 2.144(6)  |
| Ag(1)-I(7)#4  | 2.9827(11) | Zn(1)-N(1)   | 2.149(6)  |
| Ag(1)-I(6)    | 2.7810(9)  | Zn(1)-N(3)   | 2.163(6)  |
| Pb(2)-Ag(1)#2 | 3.5199(8)  | Zn(1)-N(4)   | 2.169(6)  |
| Pb(2)-Ag(1)#1 | 3.5551(8)  | Zn(1)-N(6)   | 2.172(6)  |

Symmetry transformations used to generate equivalent atoms: #1  $-x+1, -y-1, -z$ ; #2  $x, y+1, z$ ; #3  $-x+1, -y, -z$ ; #4  $x, y-1, z$ .

**Table S4.** Selected bond lengths (Å) for compound **4**.

|               |            |               |            |
|---------------|------------|---------------|------------|
| Pb(1)-Br(1)   | 2.7389(10) | Pb(2)-Br(2)   | 2.8951(10) |
| Pb(1)-Br(7)   | 2.8180(9)  | Pb(2)-Br(3)   | 2.9256(9)  |
| Pb(1)-Br(2)   | 3.0335(10) | Pb(2)-Br(4)   | 3.0024(9)  |
| Pb(1)-Br(3)#1 | 3.2836(10) | Pb(2)-Br(6)#1 | 3.0374(9)  |
| Pb(1)-Br(6)   | 3.4025(9)  | Pb(2)-Br(5)#2 | 3.2768(10) |
| Pb(1)-Br(3)   | 3.4617(10) | Pb(2)-Br(5)   | 3.3110(10) |
| Cu(1)-Br(4)#4 | 2.3383(16) | Co(1)-N(5)    | 2.104(6)   |
| Cu(1)-Br(5)#4 | 2.618(2)   | Co(1)-N(2)    | 2.110(6)   |
| Cu(1)-Br(5)#1 | 2.941(2)   | Co(1)-N(4)    | 2.117(6)   |
| Cu(1)-Br(6)   | 2.3905(16) | Co(1)-N(1)    | 2.118(6)   |
| Pb(2)-Cu(1)#3 | 3.3322(15) | Co(1)-N(3)    | 2.126(6)   |
| Pb(2)-Cu(1)#1 | 3.3368(15) | Co(1)-N(6)    | 2.137(6)   |

Symmetry transformations used to generate equivalent atoms: #1  $-x, -y-2, -z$ ; #2  $-x, -y-1, -z$ ; #3  $x, y+1, z$ ; #4  $x, y-1, z$ .

**Table S5.** Selected bond lengths (Å) for compound 5.

|               |            |               |           |
|---------------|------------|---------------|-----------|
| Pb(1)-Br(1)   | 2.7344(8)  | Pb(2)-Br(2)   | 2.8649(8) |
| Pb(1)-Br(3)   | 2.8128(8)  | Pb(2)-Br(4)   | 2.8777(8) |
| Pb(1)-Br(2)   | 3.0715(8)  | Pb(2)-Br(7)   | 2.9606(8) |
| Pb(1)-Br(6)   | 3.2515(8)  | Pb(2)-Br(6)#1 | 3.1009(8) |
| Pb(1)-Br(4)#1 | 3.3482(8)  | Pb(2)-Br(5)   | 3.4315(8) |
| Pb(1)-Br(4)   | 3.4665(8)  | Pb(2)-Br(5)#2 | 3.4521(8) |
| Ag(1)-Br(7)#4 | 2.5841(9)  | Ni(1)-N(2)    | 2.068(4)  |
| Ag(1)-Br(6)   | 2.6265(9)  | Ni(1)-N(5)    | 2.072(4)  |
| Ag(1)-Br(5)#1 | 2.8209(10) | Ni(1)-N(4)    | 2.075(4)  |
| Ag(1)-Br(5)#4 | 2.8695(10) | Ni(1)-N(1)    | 2.078(4)  |
| Pb(2)-Ag(1)#1 | 3.4756(7)  | Ni(1)-N(3)    | 2.089(4)  |
| Pb(2)-Ag(1)#3 | 3.4808(7)  | Ni(1)-N(6)    | 2.098(4)  |

Symmetry transformations used to generate equivalent atoms: #1  $-x, -y-2, -z$ ; #2  $-x, -y-1, -z$ ; #3  $x, y+1, z$ ; #4  $x, y-1, z$ .

**Table S6.** Selected bond lengths (Å) for compound 6.

|             |           |             |           |
|-------------|-----------|-------------|-----------|
| Pb(1)-Br(2) | 2.7277(8) | Pb(2)-Br(3) | 2.8682(8) |
| Pb(1)-Br(7) | 2.8102(8) | Pb(2)-Br(1) | 2.8717(8) |

|               |            |               |           |
|---------------|------------|---------------|-----------|
| Pb(1)-Br(1)   | 3.0836(8)  | Pb(2)-Br(5)   | 2.9503(7) |
| Pb(1)-Br(4)   | 3.2427(8)  | Pb(2)-Br(4)#1 | 3.1138(8) |
| Pb(1)-Br(3)#1 | 3.3787(8)  | Pb(2)-Br(6)   | 3.4361(8) |
| Pb(1)-Br(3)   | 3.4923(8)  | Pb(2)-Br(6)#2 | 3.4556(8) |
| Ag(1)-Br(5)#4 | 2.5922(9)  | Fe(1)-N(2)    | 1.963(4)  |
| Ag(1)-Br(4)   | 2.6264(9)  | Fe(1)-N(4)    | 1.964(4)  |
| Ag(1)-Br(6)#1 | 2.8221(10) | Fe(1)-N(5)    | 1.967(4)  |
| Ag(1)-Br(6)#4 | 2.8861(10) | Fe(1)-N(1)    | 1.974(4)  |
| Pb(2)-Ag(1)#1 | 3.4674(7)  | Fe(1)-N(3)    | 1.974(4)  |
| Pb(2)-Ag(1)#3 | 3.4968(8)  | Fe(1)-N(6)    | 1.976(4)  |

Symmetry transformations used to generate equivalent atoms: #1  $-x, -y-1, -z-1$ ; #2  $-x, -y, -z-1$ ; #3  $x, y+1, z$ ; #4  $x, y-1, z$ .

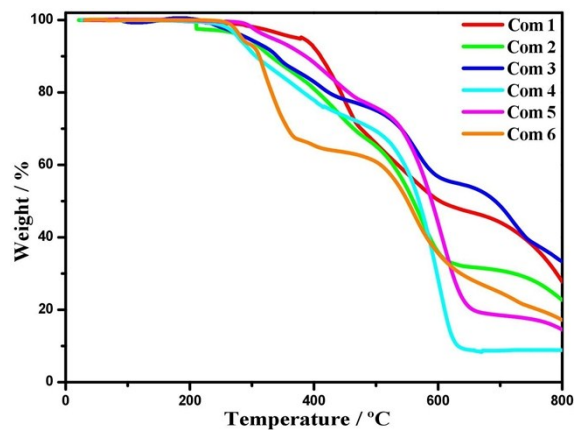

**Fig. S1.** Thermogravimetric curves for compounds 1–6.

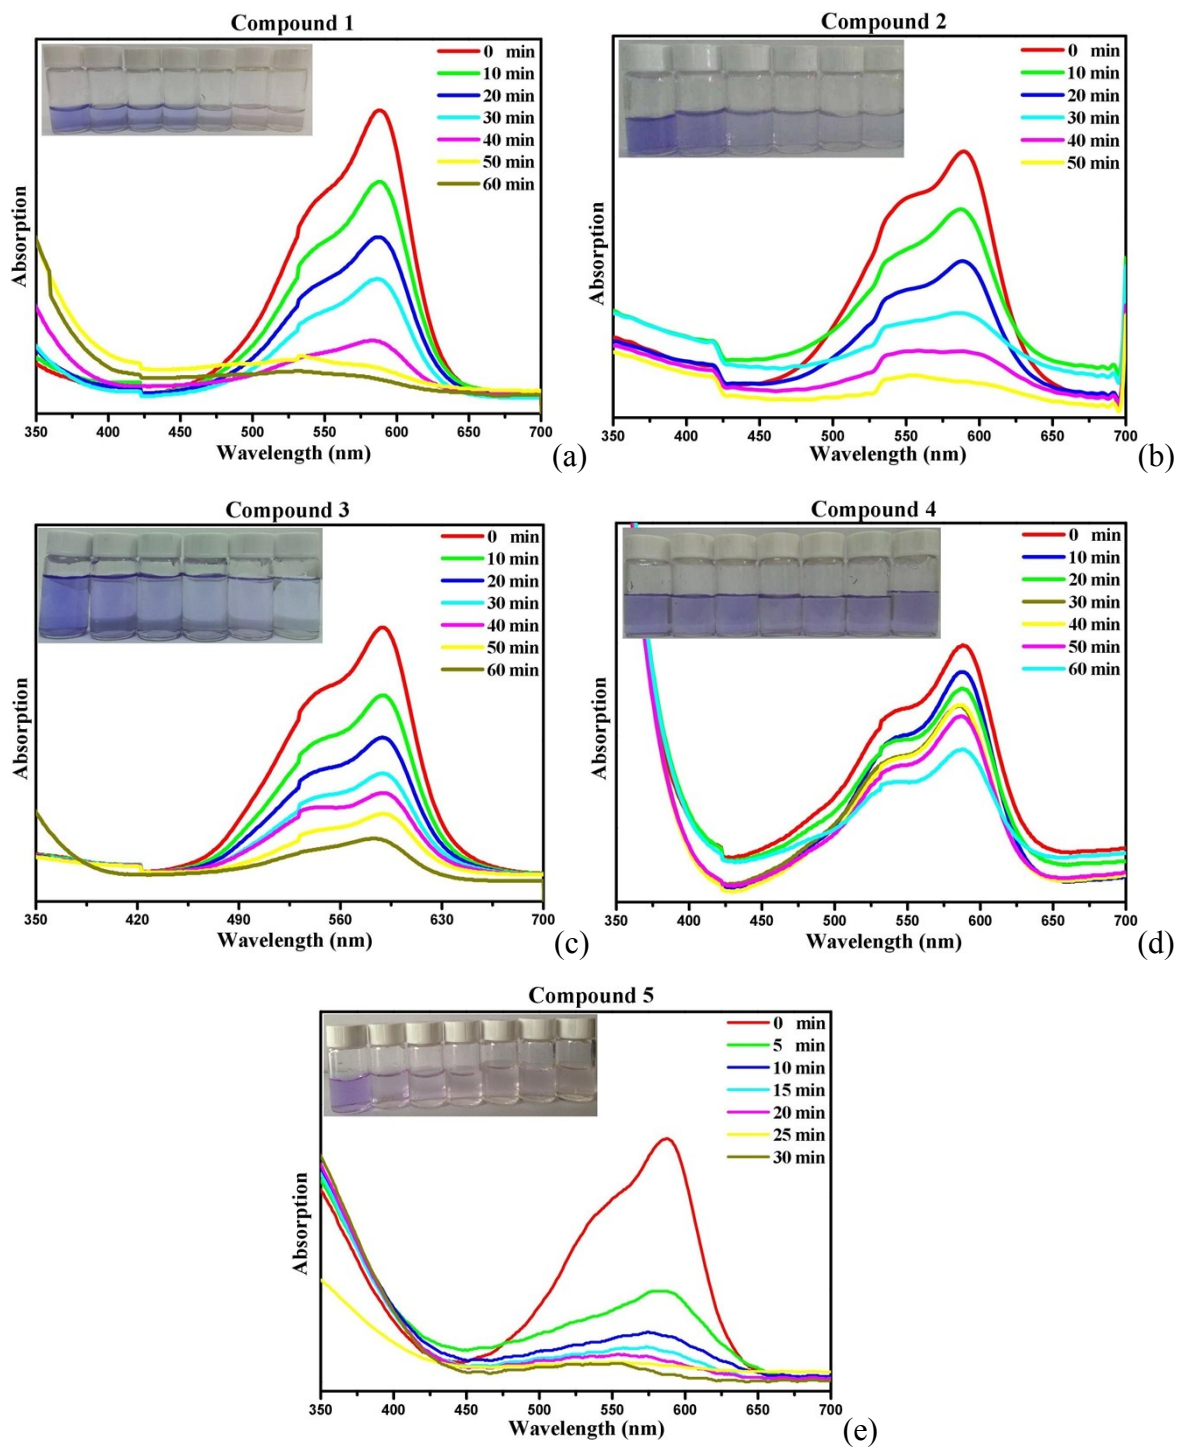

**Fig. S2.** Absorption spectra of the CV solution in the presence of compounds 1-5 under exposure to visible light (a-e).

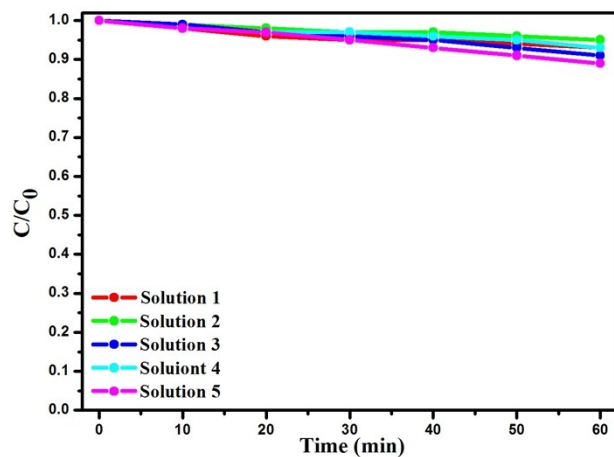

**Fig. S3.** The photodegradation ratios ( $C_0/C$ ) of CV by solution of samples 1-5 under the visible light irradiation.

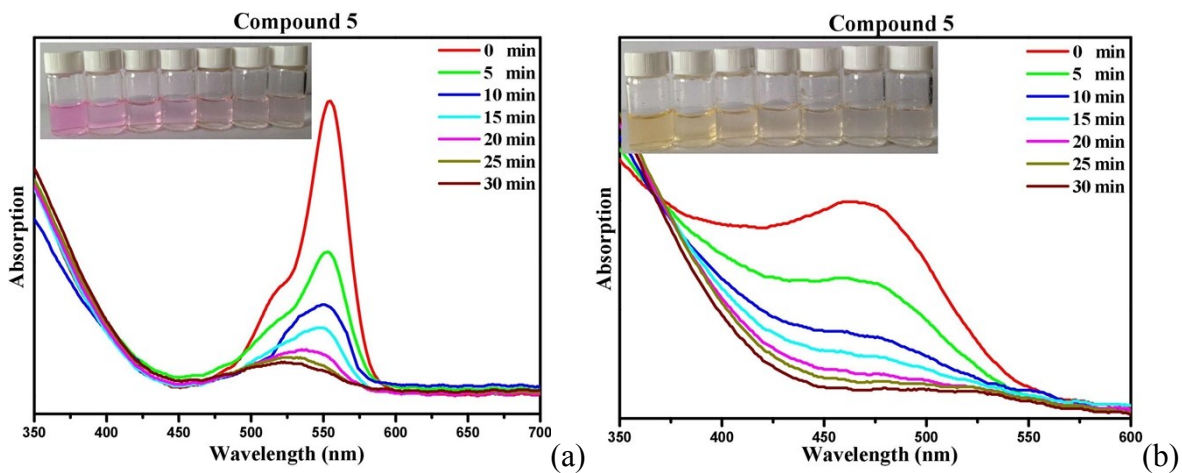

**Fig. S4.** Absorption spectra of the RhB (a) and MO (b) solution in the presence of compound 5 under exposure to visible light.

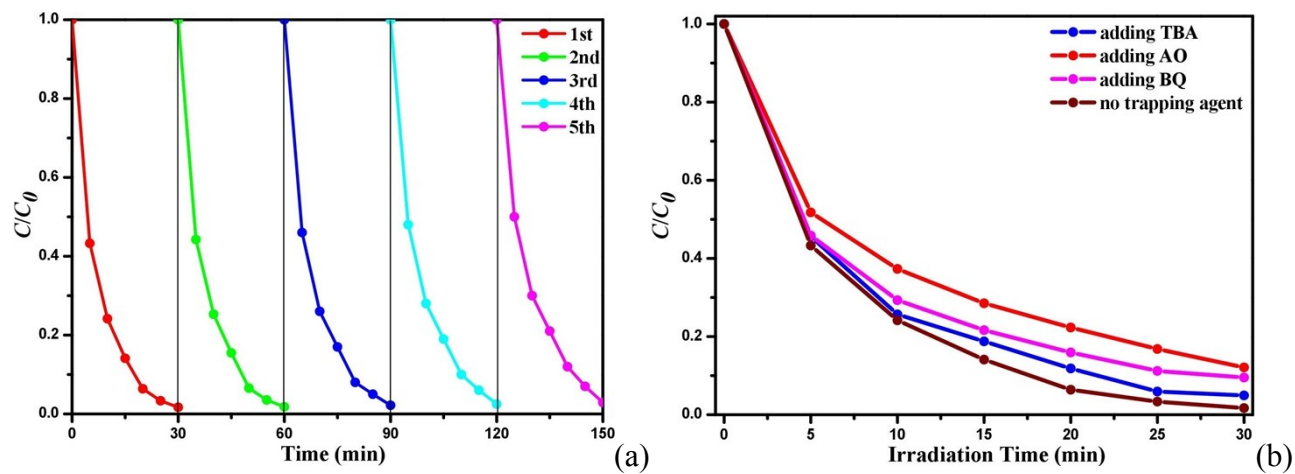

**Fig. S5.** The recyclability photocatalytic degradation of RhB (a) and radical trapping experiments of RhB over sample 5 under visible light irradiation (b).

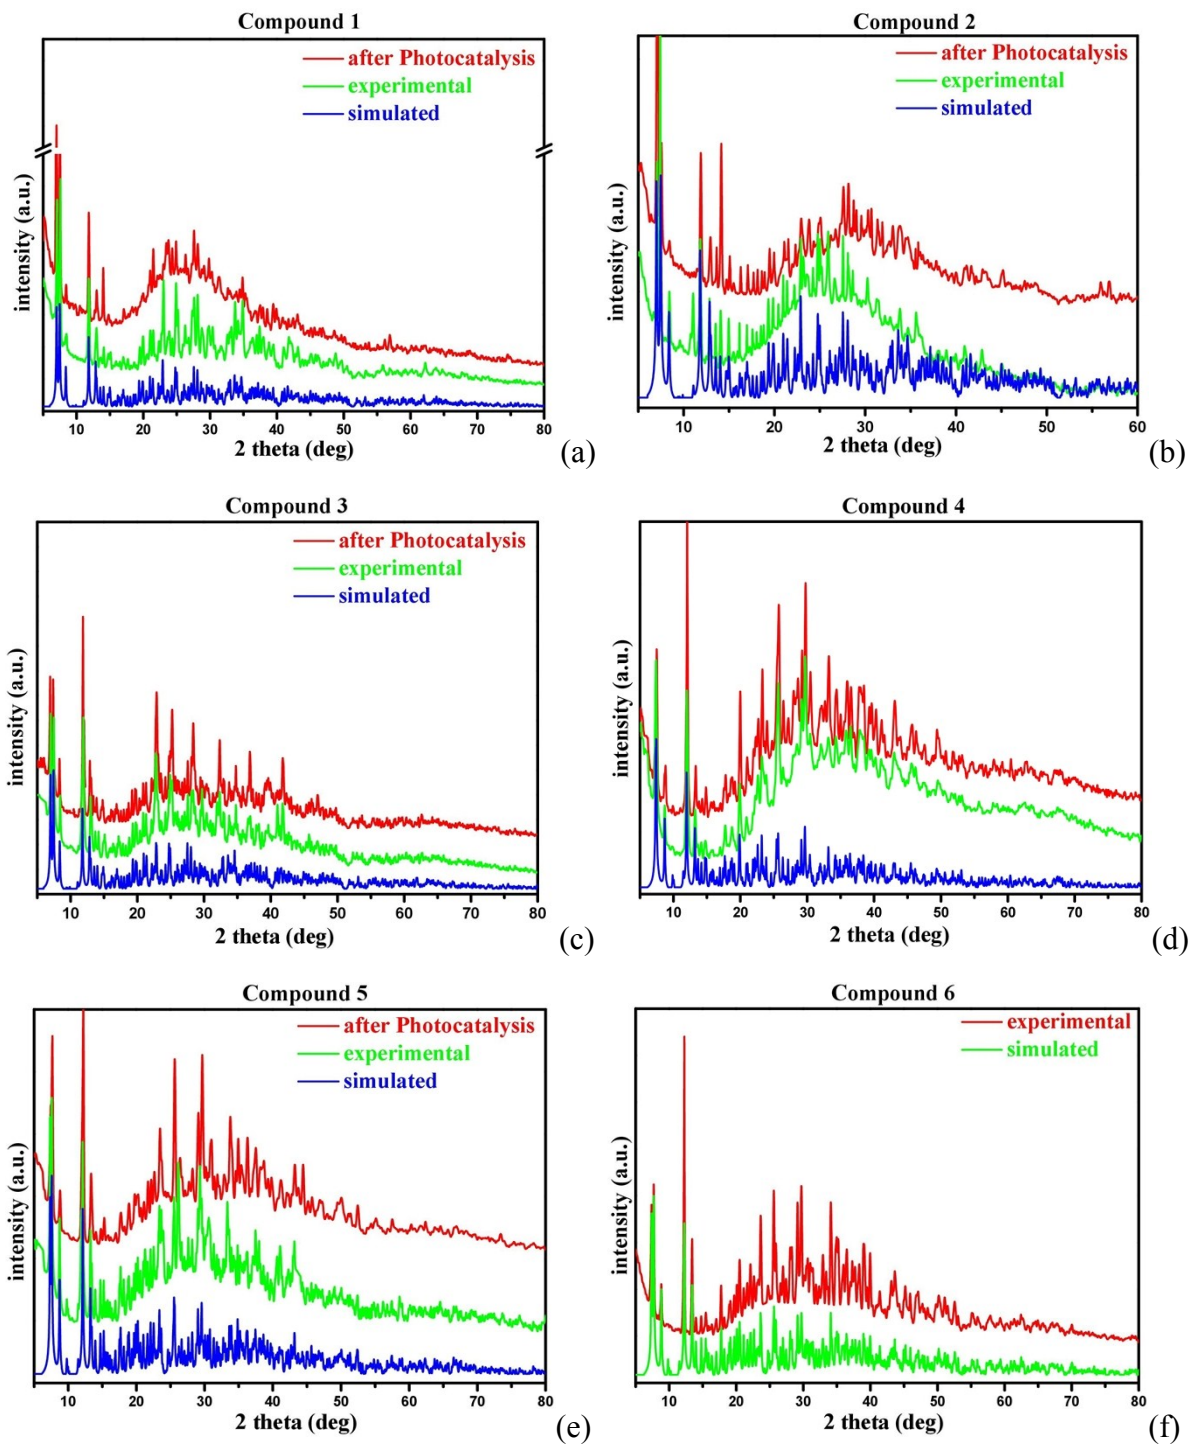

**Fig. S6.** The experimental and simulated XRD powder patterns for compounds 1-6.
